# Supplementary material for: Rice Height Monitoring between Different Estimation Models Using UAV Photogrammetry and Multispectral Technology
Source: MDPI journal article supplement (doi:10.3390/rs14010078), 2021-12-24
Supplement: s1 [file s1]

Archive with 1 entries (1 files):
- remotesensing-1519909-supplementary.pdf
