# Supplementary material for: Rice Height Monitoring between Different Estimation Models Using UAV Photogrammetry and Multispectral Technology
Source: MDPI journal article supplement (doi:10.3390/rs14010078), 2021-12-24
Supplement: s1 [file s1 › remotesensing-1519909-supplementary.pdf]

**Table S1.** Product specification comparisons between the P4P, P4R, and P4M.

| Items                                        | UAV Specification  |                   |                     |
|----------------------------------------------|--------------------|-------------------|---------------------|
|                                              | P4P                | P4R               | P4M                 |
| Weight (g), including battery and propellers | 1375               | 1391              | 1487                |
| Max flight time (minutes)                    | ~30                | ~30               | ~27                 |
| Vertical hover accuracy range                | ±0.5 m (with DGPS) | ±0.1 m (with RTK) | ± 0.1 m (with RTK)  |
| Horizontal hover accuracy range              | ±1.5 m (with DGPS) | ±0.1 m (with RTK) | ± 0.1 m (with RTK)  |
| Battery                                      | LiPo 2S            | LiPo 2S           | LiPo 2S             |
| Operation ground station                     | DJI GS PRO         | DJI GS RTK        | DJI GS PRO          |
| Camera: Sensor                               | 1-inch CMOS        | 1-inch CMOS       | Six 1/2.9 inch CMOS |
| Effective pixels                             | 20 Mega            | 20 Mega           | 2.08 Mega           |
| Focal length (mm)                            | 8.8                | 8.8               | 5.74                |
| FOV of lens                                  | 84°                | 84°               | 62.7°               |
| Image size (pixel)                           | 5472×3648          | 5472×3648         | 1600×1300           |
| Photography format                           | JPEG               | JPEG              | JPEG + TIFF         |

**Table S2.** Details on the UAV-based images.

| Flight Date | Flight Altitude<br>(m) | The Total Number of<br>Images |     |                    | The Number of<br>Images Filtered |     |                    | Weather | Calibrated Ground<br>Resolution<br>(mm/pixel) |      |      |
|-------------|------------------------|-------------------------------|-----|--------------------|----------------------------------|-----|--------------------|---------|-----------------------------------------------|------|------|
|             |                        | P4P                           | P4R | P4M<br>/Band count | P4P                              | P4R | P4M<br>/Band count |         | P4P                                           | P4R  | P4M  |
|             |                        |                               |     |                    |                                  |     |                    |         |                                               |      |      |
| 07/16/2020  | 25                     | 174                           | 330 | 1720 / 5           | 174                              | 315 | 700 / 2            | Sunny   | 0.7                                           | 6.96 | 1.33 |
| 08/08/2020  | 25                     | 265                           | 351 | 1332 / 2           | 265                              | 346 | 1332 / 2           | Sunny   | 7.31                                          | 6.94 | 1.33 |
| 08/23/2020  | 25                     | 230                           | 351 | 1326 / 2           | 230                              | 346 | 1326 / 2           | Sunny   | 6.69                                          | 6.87 | 1.31 |
| 09/27/2020  | 25                     | 295                           | 271 | 266 / 2            | 295                              | 268 | 266 / 2            | Sunny   | 6.46                                          | 6.74 | 1.3  |
| 10/25/2020  | 25                     | 192                           | 271 | 420 / 3            | 192                              | 270 | 280 / 3            | Sunny   | 6.97                                          | 6.89 | 1.34 |

**Table S3.** Details on the photogrammetry configuration.

| Item                        | Processed Image                               |                                                                 |
|-----------------------------|-----------------------------------------------|-----------------------------------------------------------------|
|                             | P4P-Base Images                               | P4R-Based Images                                                |
| Image quality estimation    | NO                                            | YES                                                             |
| Alignment: Accuracy         | HIGH                                          | HIGH                                                            |
| Pre-alignment               | Generic preselection                          | Generic preselection                                            |
| Reference preselection mode | Estimation                                    | Estimation                                                      |
| Key point limit             | 40000                                         | 40000                                                           |
| Tie point limit             | 4000                                          | 4000                                                            |
| Camera Calibration          | Auto-calibration<br>Parameters: cx, cy, k1-k3 | Pre-calibration<br>Parameters: b1, b2, cx, cy,<br>k1-k4, p1, p2 |
| Reconstruction: Quality     | HIGH                                          | HIGH                                                            |
| Filtering mode              | Mild                                          | Mild                                                            |

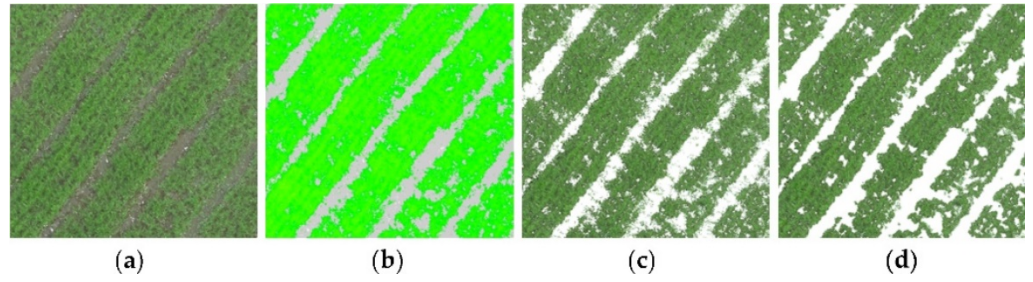

**Figure S1.** The workflow of the VI filter: (a) the original DSPC; (b) DSPC mapping after applying the VI filter; (c) the DSPC after VARI thresholding; (d) the DSPC<sub>canopy</sub> after noise removal via a Statistical Outlier Filter (SOF) tool in CloudCompare.

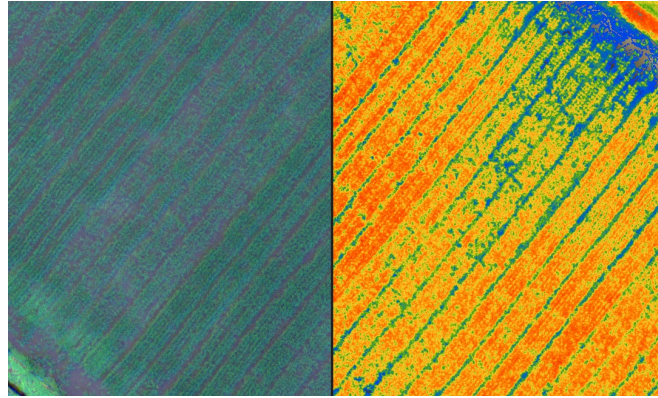

**Figure S2.** Orthomosaic mapping containing multispectral information (partially). The mapping consisting of five original bands of information is shown on the left, and the NDVI mapping calculated using RED and NIR bands is shown on the right.

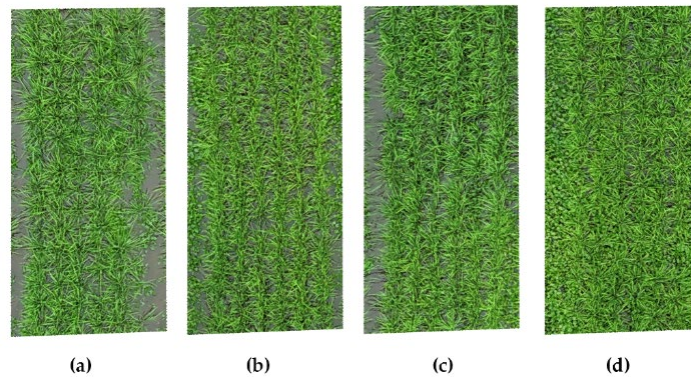

**Figure S3.** The specific manifestations of different treatments: (a) *low density without cover crop*; (b) *low density with cover crop*; (c) *high density without cover crop*; (d) *high density with cover crop*.
